# Supplementary material for: Genomic Patterns of Divergence in the Early and Late Steps of Speciation of the Deep-Sea Vent Thermophilic Worms of the Genus Alvinella
Source: Research Square preprint supplement (doi:10.21203/rs.3.rs-1405281/v1), 2022-03-07
Supplement: Supplementary file 1 [file 330ae4517f4c2ab30d6abc86.docx]

- **Supplementary table 1**

  Metrics of the genomic data used for the study
- **Supplementary table 2**

  Annotation of the divergent genes and genes under selection based on the Megablast match (blastn).

**Tab#1: Acauda_Apompejana_HER_genes**

Annotation of the genes associated with a high evolutionary rate (dS > 0.5) between *A. caudata* and *A. pompejana*

**Tab#2: AcaudApomp_PosSelectin_genes**

Annotation of the genes associated with a high dN/dS (>1) between *A. caudata* and *A. pompejana*

**Tab#3: AcaudApomp_PosSelectin_functions**

List of molecular functions/biological processes/ligands impacted by genes associated with high dN/dS between *A. caudata* and *A. pompejana*

**Tab#4: ApN/ApS_HER_genes**

Annotation of the genes associated with a high evolutionary rate (dS > 0.5) between *A. pompejana* North/South

**Tab#5: ApN/ApS_PosSelectin_genes**

Annotation of the genes associated with a high dN/dS (>1) between *A. pompejana* North/South

**Tab#6: ApN/ApS_PosSelectin_functions**

List of molecular functions/biological processes/ligands impacted by genes associated with high dN/dS between *A. pompejana* North/South
